# Supplementary material
Source: Springer Nature journal article supplement (https://www.springermedizin.de/resource/supplementary/12960_2013_380_MOESM3_ESM.pdf/9569986)
Supplement: MOESM3 [file 9569986]

## Brain drain

- The emigration of Irish doctors due to frustration with working conditions, training and career progression

## Brain gain

- The immigration of non-EU migrant doctors to fill vacancies in the Irish health system

## Brain waste

- The de-skilling, and lack of career progression for many non-EU migrant doctors results in frustration

## Brain drain

- The emigration of non-EU migrant doctors from Ireland due to frustration with working conditions, training and career progression
